# Supplementary material
Source: Springer Nature journal article supplement (https://www.springermedizin.de/resource/supplementary/13643_2012_91_MOESM5_ESM.pdf/9681484)

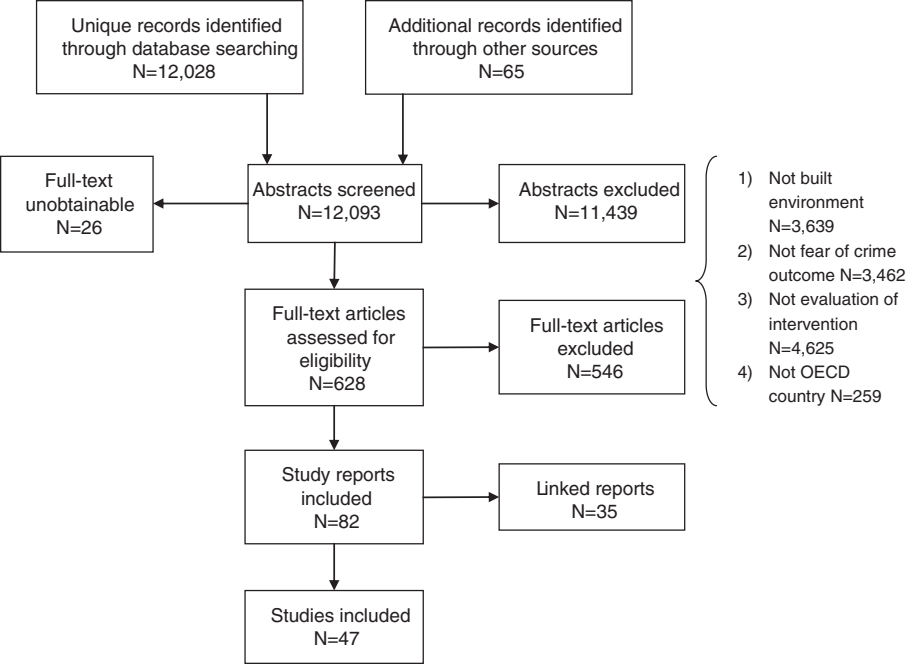

Supplement: MOESM5 [file 9681484]
